# Supplementary figures and images for: Pushing the detection limit of infrared spectroscopy for structural analysis of dilute protein samples
Source: Royal Society of Chemistry journal article supplement (doi:10.1039/c4an00918e), 2014-01-01

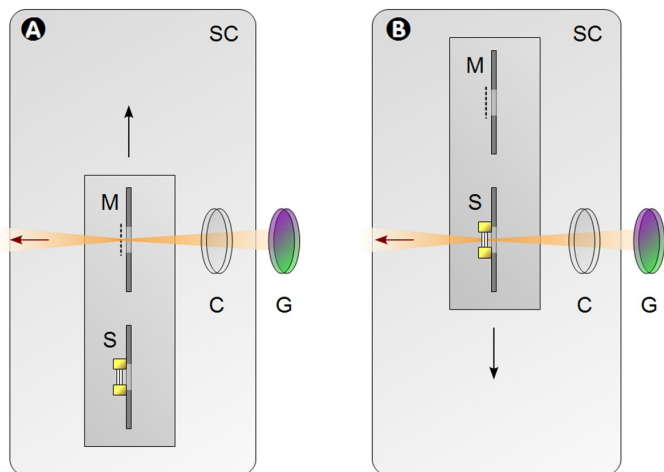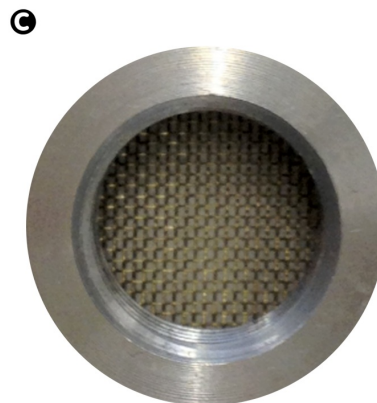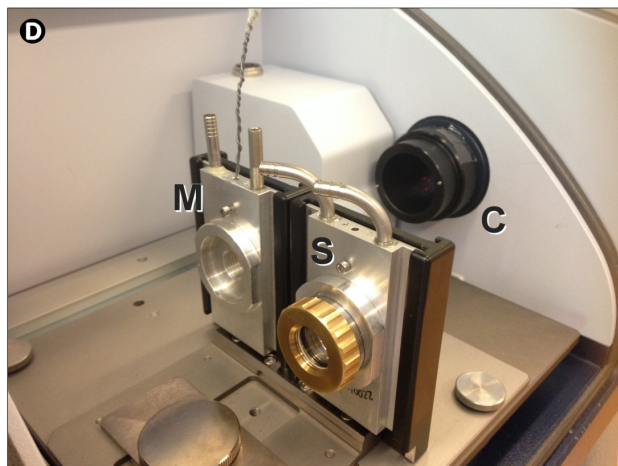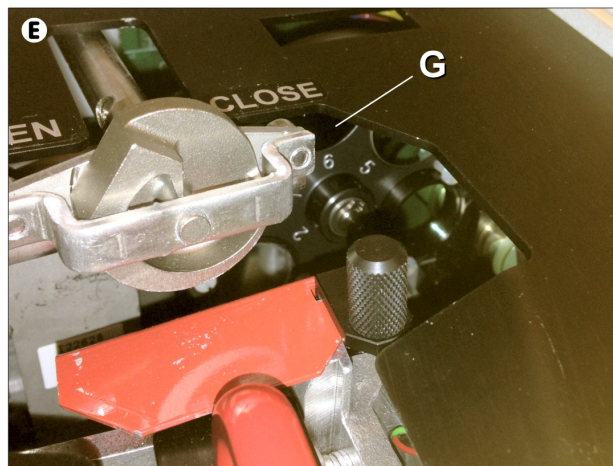

Supplement: c4an00918e4.pdf [file c4an00918e4.pdf]
